# Supplementary material for: Correction of Hyponatremia May Be a Treatment Stratification Biomarker: A Two-Stage Systematic Review and Meta-Analysis
Source: MDPI journal article supplement (doi:10.3390/jcm7090262), 2018-09-07
Supplement: s1 [file s1]

**Supplementary Table S1.** Assessment of risk of bias in eligible studies.

| <b>Trials</b>                   | <b>Random<br/>sequence<br/>generation</b> | <b>Allocation<br/>concealment</b> | <b>Blinding of<br/>participants<br/>and personnel</b> | <b>Blinding of<br/>outcome<br/>assessment</b> | <b>Incomplete<br/>outcome data</b> | <b>Selective<br/>reporting</b> | <b>Other bias</b> |
|---------------------------------|-------------------------------------------|-----------------------------------|-------------------------------------------------------|-----------------------------------------------|------------------------------------|--------------------------------|-------------------|
| <b>Conivaptan</b>               | L                                         | L                                 | U                                                     | U                                             | U                                  | U                              | U                 |
| <b>HARMONY</b>                  | L                                         | L                                 | U                                                     | U                                             | U                                  | L                              | U                 |
| <b>LIBRA</b>                    | L                                         | L                                 | U                                                     | U                                             | U                                  | L                              | U                 |
| <b>VPA</b>                      | L                                         | L                                 | U                                                     | U                                             | L                                  | U                              | U                 |
| <b>VPA-985</b>                  | L                                         | L                                 | U                                                     | U                                             | L                                  | U                              | U                 |
| <b>DILIPO</b>                   | L                                         | L                                 | U                                                     | U                                             | L                                  | L                              | U                 |
| <b>Soupart et al.,<br/>2006</b> | L                                         | L                                 | U                                                     | U                                             | L                                  | U                              | U                 |
| <b>HypoCAT</b>                  | L                                         | L                                 | U                                                     | U                                             | L                                  | L                              | U                 |

|                                      |   |   |   |   |   |   |   |
|--------------------------------------|---|---|---|---|---|---|---|
| <b>SALT1-SALT2</b>                   | L | L | U | L | U | L | U |
| <b>ACTIF in CHF</b>                  | L | L | U | U | U | U | U |
| <b>EVEREST</b>                       | L | L | U | U | L | L | U |
| <b>Tolvaptan</b>                     | L | L | U | U | U | U | U |
| <b>PUMCH</b>                         | L | L | U | U | U | U | U |
| <b>MD Anderson<br/>Cancer Center</b> | L | L | U | U | U | L | U |
| <b>Shanmugam et<br/>al., 2015</b>    | L | L | U | U | L | L | L |

Judgement for each of the risk of bias domains is presented as L, U or H, indicating, respectively, low, unclear or high risk of bias.
